# Supplementary material for: Rapid analysis of dechloranes in sediment and soil by selective pressurized liquid extraction using Mg–Al layered double oxides as sorbents
Source: Royal Society of Chemistry journal article supplement (doi:10.1039/c7ay00009j), 2017-01-01
Supplement: c7ay00009j1.pdf [file c7ay00009j1.pdf]

**Table S1** soil sampling points and soil types

| Sampling points | Location Description                             | Soil types |
|-----------------|--------------------------------------------------|------------|
| Soil 1#         | around the reservoir after river water filtered  | Sandy Loam |
| Soil 2#         | around the reservoir before river water filtered | Sandy Loam |
| Soil 3#         | the sandy of apple orchard                       | Loamy Sand |
| Soil 4#         | downstream of apple orchard                      | Loam       |
| Soil 5#         | puddle                                           | Loamy Sand |

The reservoir, apple orchard and puddle were located 8, 6 and 4 kilometers from the plant.

**Figure. S1**

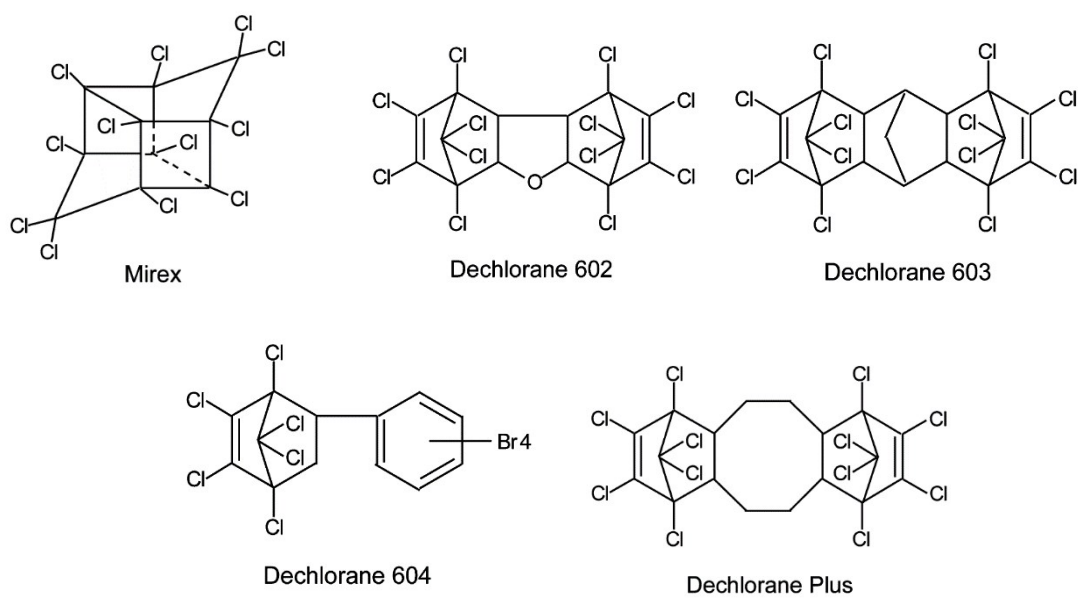

Figure S1. Chemical structures of Mirex, Dec 602, Dec 603, Dec 604 and DP

Figure. S2

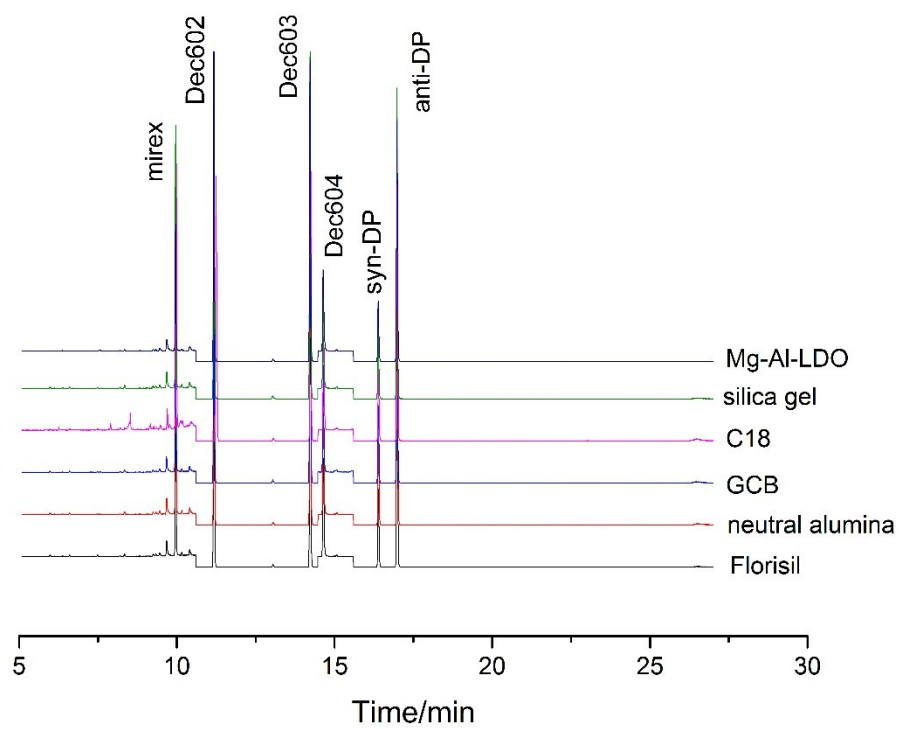

Fig. S2. Dechloranes chromatograms of sediment sample obtained from using different sorbents: Florisil, neutral alumina, silica gel, C18, GCB and Mg-Al-LDO.

Figure. S3

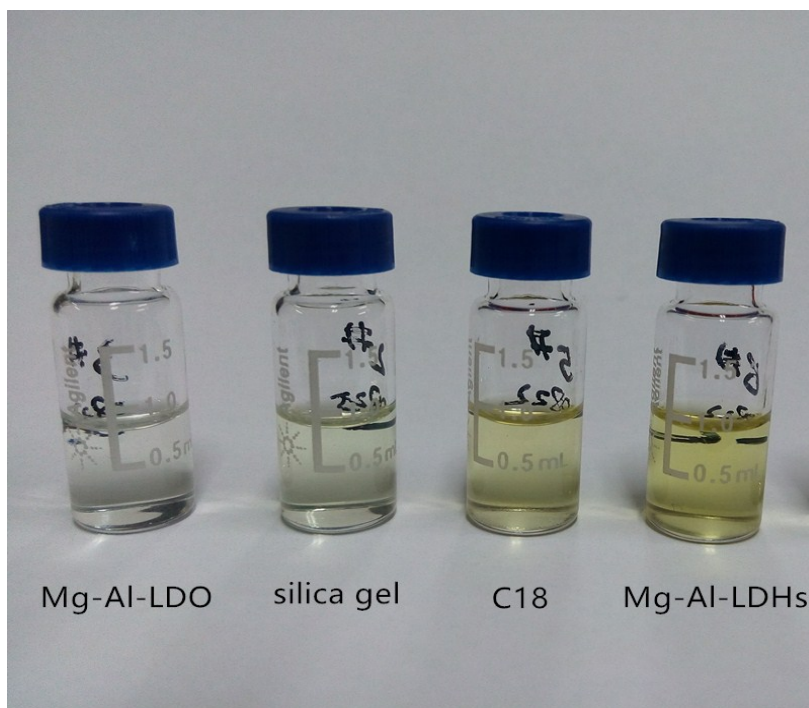

Fig. S3. The SPLE extracts acquired from sediment using different sorbents

Figure. S4

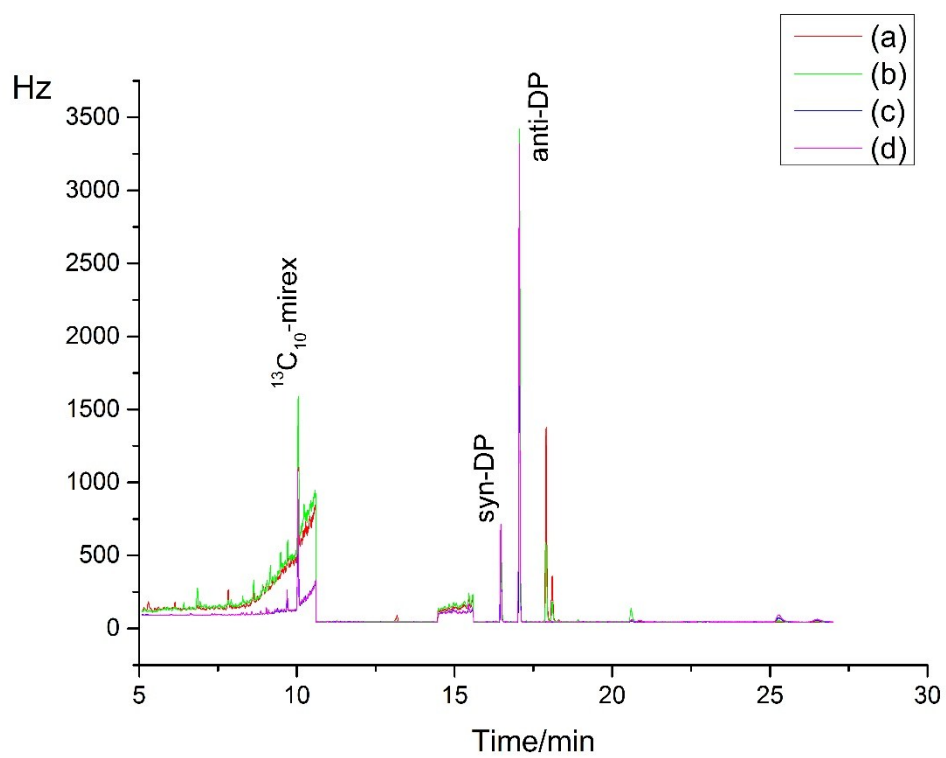

Fig. S4. Dechloranes chromatograms obtained from using different extraction solvents for real sediment samples: (a) dichloromethane (DCM): acetone (1:1, v/v); (b) acetone: hexane (1:1, v/v); (c) DCM; (d) DCM: hexane (1:1, v/v).

Figure. S5

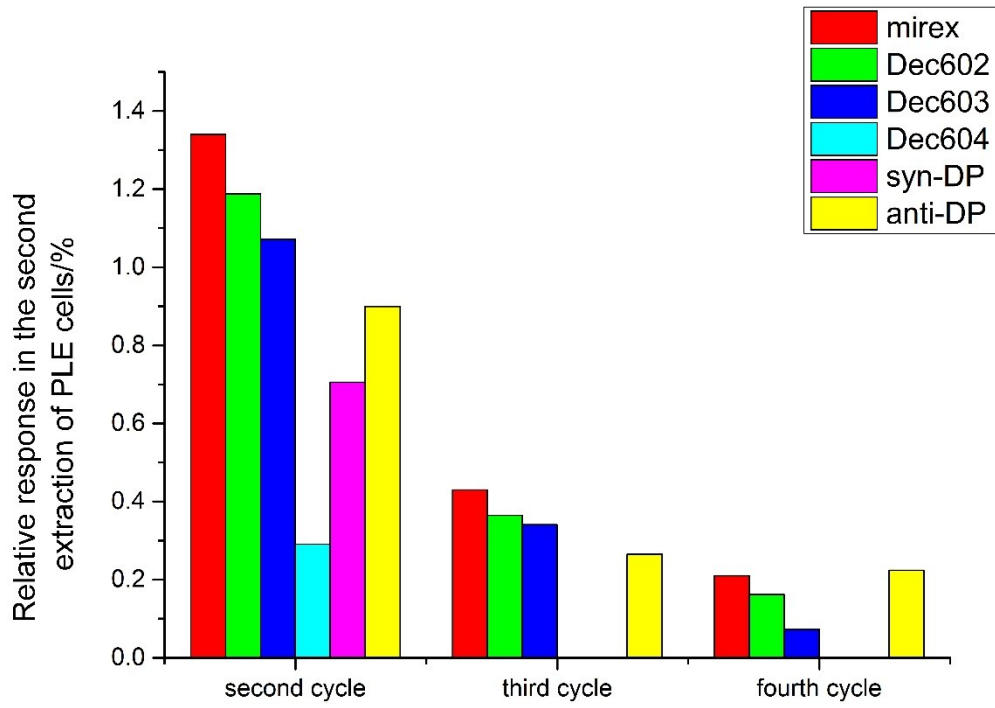

Fig. S5. Relative responses obtained in the re-extraction of SPLE cells vs. the number of static cycles considered in the first extraction. Average data for duplicate experiments (n=3).

Figure. S6

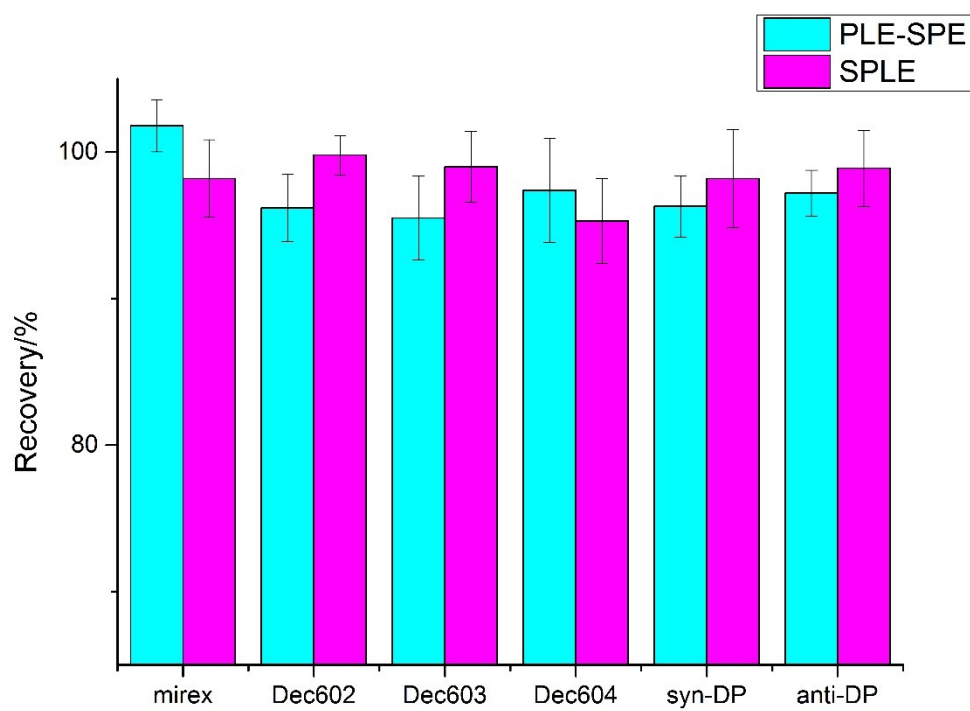

Fig. S6. Dechloranes recoveries by using SPLE and PLE-SPE method (n=3).

Figure. S7

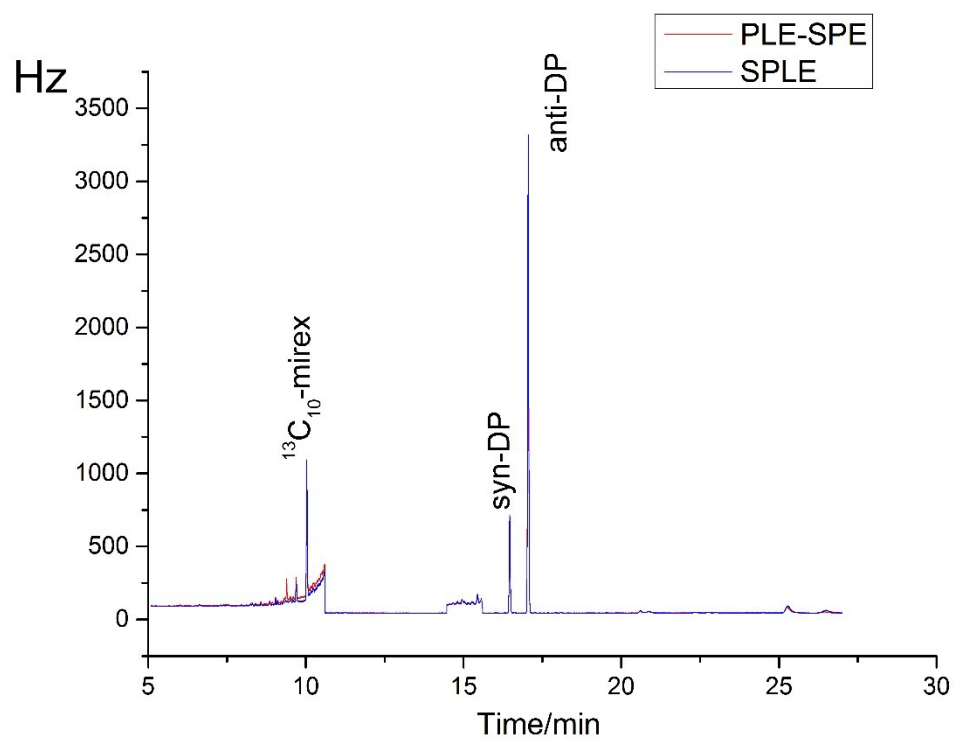

Fig. S7. Dechloranes chromatograms obtained from using PLE-SPE and SPLE method for real sediment samples.
